# Supplementary material
Source: ML conference proceedings conference paper supplement (https://proceedings.neurips.cc/paper_files/paper/2024/hash/9566607d423f8c32a2d5ce09a8b62232-Abstract.html)
Supplement: Supplementary file 1 [file 9566607d423f8c32a2d5ce09a8b62232-Supplemental-Datasets_and_Benchmarks_Track.pdf]

# Supplemental Material for TAPVid-3D

## Table of Contents

1. [More Dataset Samples](#)
2. [Dataset Statistics](#)
3. [Evaluations using Median, Per-Trajectory, and Local Neighborhood Scaling](#)
4. [Evaluations using Fixed Metric Distance Thresholds](#)
5. [Baselines Details and Compute Resources](#)
6. [Filtering Incorrect Trajectories](#)
7. [Dataset Specifications, Metadata, and other Details](#)
8. [Visualized Samples](#)

## 1. More Dataset Samples

We provide visualizations illustrating each of the TAPVid-3D dataset splits in HTML in the following files: [pstudio.html](#), [adt.html](#), [drivetrack.html](#), which display the mp4 files also available in the `video_visualization` folder, as well as links to interactive 3D visualizations. We included as many samples as we could fit within the 50MB supplementary size limit.

In addition, we provide the reviewers with a Colab Notebook\*, which enables interested reviewers to read, load, interact with, and generate visualizations for all the data in the `minival` split (containing samples from all three constituent data sources). This can help with understanding the format and contents of each dataset example. Reviewers can run this Colab notebook online at:

<https://colab.research.google.com/drive/1Ro2sE01Avq-h0lixrUBB0oTYXEwXNr66>

Finally, we include static visualizations of trajectories in the figures included in the [Visualized Samples](#) section at the end of this PDF.

## 2. Dataset Statistics

Figure 1 showcases various summary statistics about the TAPVid-3D datasets and its 3D point trajectories. In the top left, we have the distribution of the number of frames in each video. The ADT-sourced videos contain the longest videos, and clips of 300 frames were extracted. Similarly Panoptic Studio contains clips of 150 frames, while DriveTrack contains clips of varying duration. In the top right, we have the number of point tracks annotated in each clip. In the bottom right, we count the number of ‘static’ trajectories in each video, marking a trajectory as static if the distance between all pairwise locations within a single point’s trajectory is less than 1 centimeter. The roughly 10 DriveTrack videos consisting of static trajectories are usually cars stopped at stoplights. These ‘static’ videos are a small minority of the 4000+ clips in TAPVid-3D. In the bottom right, we show the average velocity of each trajectory in the dataset, noting that trajectories in DriveTrack are the fastest. These histograms convey that there is a diversity of overall trajectory lengths, video lengths, and point velocities in the TAPVid-3D dataset. Additionally, this dataset is larger than two widely used 2D point tracking real-world-video datasets: TAPVid-Kinetics (1,189 videos) and TAPVid-DAVIS (30 videos).

## 3. Metrics using *Median, Per-Trajectory, and Local Neighborhood Rescaling*

In the results included in the main paper, we compute the 3D Average Jaccard and APD metrics using a *global median* rescaling procedure (L277). To get a good score, the entire scene must be

---

\*The Colab does not collect any view analytics, or track visitors (in any way accessible to the authors of this work).

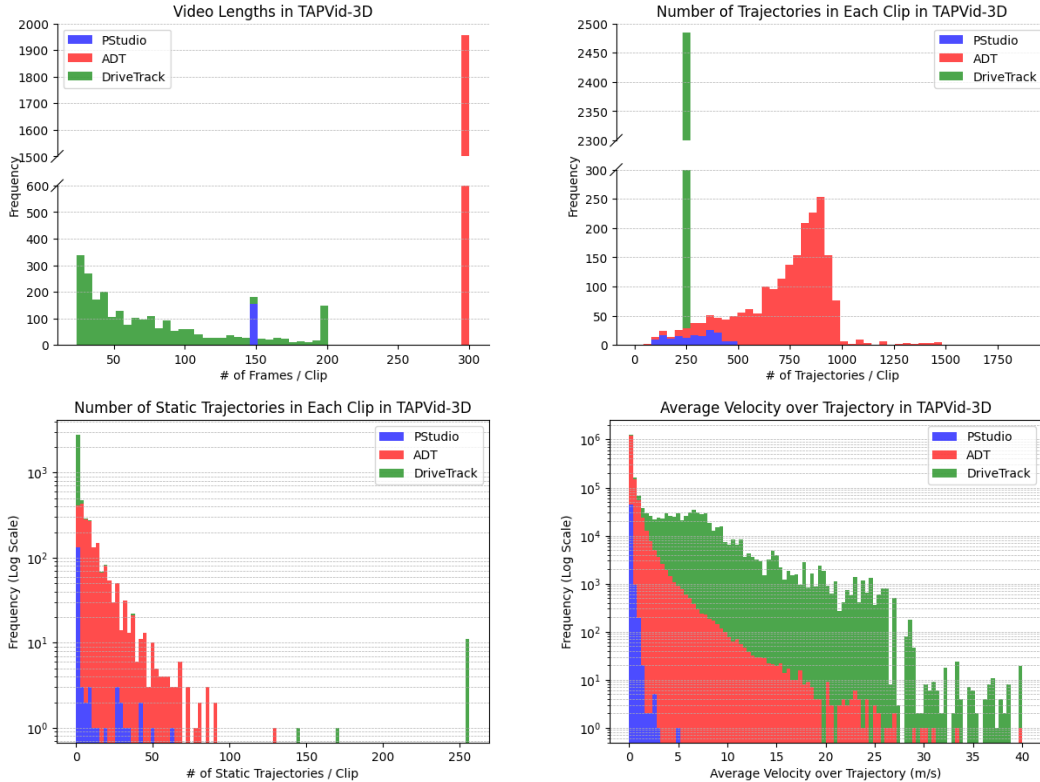

Figure 1: Statistics on TAPVid-3D. Top left: video lengths. Top right: Number of trajectories in each clip. Bottom left: Number of static tracks in each clip. Bottom right: average point velocity.

41 reconstructed up to scale, and dynamic objects must be placed precisely. This is useful for many  
 42 applications, such as navigation, but for others it may be overly stringent. If there is little camera  
 43 motion, or if some of the objects have unclear size, it may also be very difficult for models to infer  
 44 global scene shape.

45 However, not all applications require such strong global scene shape capabilities. For example,  
 46 for imitation learning, we may want an agent to simply approach an object. For such applications,  
 47 measuring the relative depth of estimated 3D locations along a *single trajectory* may be sufficient, and  
 48 it may be substantially easier, as the (2D) scaling of local textures may provide enough information to  
 49 solve the problem. More generally, for robotic imitation of an assembly task, it is the *local* consistency  
 50 that’s most important: as long as points that are near each other in 3D have the correct depth relative  
 51 to one another, then the relative pose of the assembled parts will be clear, especially at the critical  
 52 stage when the assembled parts are close together.

53 To enable more rapid progress in such domains, we propose two additional approaches to rescaling  
 54 estimated trajectories to match the ground-truth 3D point cloud: *Per-Trajectory*, and *Local Neighbor-*  
 55 *hood*. We apply the same Average Jaccard metric regardless of how the points are rescaled,  
 56 although in the case of Local Neighborhood, the ground truth trajectories are also slightly modified,  
 57 as explained below. In all cases, users can evaluate the same predictions using any metric without  
 58 providing any extra information.

59 Per-Trajectory scaling is computed by rescaling each track  $P^i$  separately, multiplying by  $\|P_{t_q}^i\|/\|\hat{P}_{t_q}^i\|$ ,  
 60 where  $t_q$  is the query frame index, and then computing 3D AJ as before. As a result, methods must  
 61 only compute the *relative* depth for the point at each time, relative to the query frame.

62 Local Neighborhood is somewhat more involved. Here, the goal is to capture whether *nearby* points  
 63 are scaled correctly relative to one another, even if distant parts of the scene may not be. For example,  
 64 if the goal is to understand an action depicted in a video that uses a tool, it is typically important  
 65 to understand where the hand is relative to the tool, and where the tool is relative to the objects it’s  
 66 acting on. The distance to the backgrounds—such as the back wall of the room—may not be obvious,  
 67 especially if there’s relatively little camera motion. However, precisely computing these distances is  
 68 not relevant to understanding the tool’s motion.

69 Intuitively, we wish to find an intermediate between two extremes: either rescaling the entire scene  
 70 with a single scale factor, or rescaling every point with its own scale factor. To this end, we propose to  
 71 scale each track according to the other track segments that intersect with its *4D tubelet* [8], according  
 72 to a fixed neighborhood radius.

73 Specifically, we start by choosing a single neighborhood radius  $\tau$  specified in meters. For a given  
 74 trajectory  $P^i$ , we first find all points that are within  $\tau$  meters of the ground truth on any frame, which  
 75 define the tubelet  $\mathcal{T}(P^i)$  associated to the trajectory  $P^i$ :

$$\mathcal{T}(P^i) = \{P_t^j \text{ s.t. } \|P_t^j - P_t^i\| < \tau\}.$$

76 Note that tubelet  $\mathcal{T}(P^i)$  includes the trajectory  $P^i$  entirely, plus the portions of the trajectories of the  
 77 other points where they come closer than the tubelet’s radius  $\tau$ . For each selected ground-truth point  
 78 in the tubelet, we select the corresponding points from the predictions to construct  $\mathcal{T}(P^i; \hat{P}^i)$  as

$$\mathcal{T}(P^i; \hat{P}^i) = \{\hat{P}_t^j \text{ s.t. } \|P_t^j - P_t^i\| < \tau\}.$$

79 Analogously, we select the predicted and ground-truth visibility  $\mathcal{T}(\hat{v}^i)$  and  $\mathcal{T}(v^i)$ .

80 Finally, given a predicted tubelet  $\mathcal{T}(P^i; \hat{P}^i)$ , we rescale all its points together using the ratio of query  
 81 point distances  $\|P_{t_q}^i\|/\|\hat{P}_{t_q}^i\|$ , and evaluate the rescaled tubelet set as if it were a single trajectory, by  
 82 replacing  $P^i$ ,  $\hat{P}^i$  and  $v_i$  with their tubelet counterparts in equations (5) or (6) to compute the  $APD_{3D}$   
 83 and  $AJ_{3D}$  respectively. In our experiments, we set the radius  $\tau$  to 3 centimeters for the PStudio and  
 84 Aria scenes, and as 10 centimeters for the DriveTrack scenes, across all experiments. This is because  
 85 tabletop manipulation and human-object motion likely require finer-grained movement than large  
 86 vehicle movement in the Waymo Open public road scenes.

|                       | Baseline | Aria             |                |               | DriveTrack       |                |               | PStudio          |                |               | Average          |                |               |
|-----------------------|----------|------------------|----------------|---------------|------------------|----------------|---------------|------------------|----------------|---------------|------------------|----------------|---------------|
|                       |          | 3D-AJ $\uparrow$ | APD $\uparrow$ | OA $\uparrow$ | 3D-AJ $\uparrow$ | APD $\uparrow$ | OA $\uparrow$ | 3D-AJ $\uparrow$ | APD $\uparrow$ | OA $\uparrow$ | 3D-AJ $\uparrow$ | APD $\uparrow$ | OA $\uparrow$ |
| BootsTAPIR + Zoedepth | 17.3     | 27.0             | 86.5           | 7.4           | 12.3             | 85.3           | 12.3          | 20.6             | 82.7           | 12.3          | 20.0             | 84.8           |               |
| CoTracker + Zoedepth  | 17.4     | 26.3             | 87.8           | 6.7           | 12.3             | 82.6           | 12.0          | 20.8             | 80.0           | 12.0          | 19.8             | 83.4           |               |
| TAPIR + Zoedepth      | 16.2     | 24.2             | 79.7           | 7.4           | 12.2             | 81.6           | 12.0          | 20.0             | 78.7           | 11.9          | 18.8             | 80.0           |               |
| BootsTAPIR + COLMAP   | 28.8     | 41.3             | 78.6           | 20.0          | 29.3             | 83.8           | 12.9          | 20.8             | 81.8           | 20.6          | 30.4             | 81.4           |               |
| CoTracker + COLMAP    | 26.8     | 38.3             | 78.6           | 18.2          | 28.8             | 81.7           | 12.1          | 19.7             | 77.2           | 19.1          | 28.9             | 79.1           |               |
| TAPIR + COLMAP        | 26.5     | 37.7             | 72.6           | 16.5          | 24.6             | 80.4           | 12.1          | 19.6             | 75.2           | 18.4          | 27.3             | 76.1           |               |
| TAPIR-3D              | 8.5      | 14.9             | 86.0           | 10.2          | 17.0             | 83.3           | 7.2           | 13.1             | 78.9           | 8.6           | 15.0             | 82.8           |               |
| SpatialTracker        | 17.4     | 26.9             | 89.0           | 9.0           | 16.1             | 83.7           | 14.2          | 24.6             | 78.6           | 13.6          | 22.5             | 83.7           |               |
| Static Tracks         | 5.4      | 11.8             | 55.4           | 4.8           | 8.4              | 80.8           | 6.4           | 12.7             | 75.8           | 5.5           | 11.0             | 70.7           |               |

Table 1: **Using per-trajectory depth scaling.** We compare the performance on the `full_eval` split of several 2D-TAP models [3, 4, 6] combined with ZoeDepth [2] and COLMAP [10] on the TAPVid-3D benchmark. We also measure performance on the recently released SpatialTracker [12], and a static point baseline, in which the predicted trajectories are exactly the same as the query point.

#### 87 4. Evaluations with Median, Per-Trajectory, and Local Neighborhood Scaling

88 Tables 1, 2, 3 present additional experimental results on the `full_eval` set, on all our baselines. To  
 89 avoid biasing the results to the TAPVid3d splits with higher number of videos, these tables present  
 90 averaged results across the three constituent data sources (weighing each source equally, rather than  
 91 weighted by dataset size, as was done in Table 3 in the main paper).

| Baseline              | Aria    |       |      | DriveTrack |       |      | PStudio |       |      | Average |       |      |
|-----------------------|---------|-------|------|------------|-------|------|---------|-------|------|---------|-------|------|
|                       | 3D-AJ ↑ | APD ↑ | OA ↑ | 3D-AJ ↑    | APD ↑ | OA ↑ | 3D-AJ ↑ | APD ↑ | OA ↑ | 3D-AJ ↑ | APD ↑ | OA ↑ |
| BootsTAPIR + Zoedepth | 16.8    | 26.3  | 86.7 | 6.4        | 10.9  | 85.3 | 11.6    | 19.6  | 82.6 | 11.6    | 18.9  | 84.9 |
| CoTracker + Zoedepth  | 17.0    | 25.7  | 88.0 | 6.0        | 10.9  | 82.6 | 11.4    | 19.9  | 80.0 | 11.4    | 18.8  | 83.5 |
| TAPIR + Zoedepth      | 15.7    | 23.5  | 79.8 | 6.3        | 10.5  | 81.6 | 11.2    | 18.9  | 78.7 | 11.0    | 17.6  | 80.1 |
| BootsTAPIR + COLMAP   | 26.1    | 38.0  | 78.8 | 16.6       | 25.1  | 83.8 | 10.8    | 17.8  | 81.8 | 17.8    | 27.0  | 81.5 |
| CoTracker + COLMAP    | 24.6    | 35.3  | 78.8 | 15.7       | 25.2  | 81.7 | 10.8    | 17.7  | 77.1 | 17.0    | 26.1  | 79.2 |
| TAPIR + COLMAP        | 23.8    | 34.4  | 72.8 | 12.9       | 20.3  | 80.4 | 9.9     | 16.5  | 75.1 | 15.5    | 23.7  | 76.1 |
| TAPIR-3D              | 7.3     | 12.9  | 86.3 | 5.9        | 10.5  | 83.4 | 5.1     | 9.6   | 78.9 | 6.1     | 11.0  | 82.8 |
| SpatialTracker        | 16.7    | 25.7  | 89.3 | 6.9        | 12.4  | 83.7 | 12.3    | 21.6  | 78.5 | 12.0    | 19.9  | 83.8 |
| Static Tracks         | 5.5     | 11.8  | 56.0 | 4.8        | 8.4   | 80.8 | 6.4     | 12.6  | 75.7 | 5.5     | 10.9  | 70.8 |

Table 2: **Using local neighborhood scaling.** We compare the performance on the `full_eval` split of 2D-TAP models [3, 4, 6] combined with ZoeDepth [2] and COLMAP [10]. We also include SpatialTracker [12], and a static point baseline.

| Baseline              | Aria    |       |      | DriveTrack |       |      | PStudio |       |      | Average |       |      |
|-----------------------|---------|-------|------|------------|-------|------|---------|-------|------|---------|-------|------|
|                       | 3D-AJ ↑ | APD ↑ | OA ↑ | 3D-AJ ↑    | APD ↑ | OA ↑ | 3D-AJ ↑ | APD ↑ | OA ↑ | 3D-AJ ↑ | APD ↑ | OA ↑ |
| BootsTAPIR + Zoedepth | 9.9     | 16.3  | 86.5 | 5.4        | 9.2   | 85.3 | 11.3    | 19.0  | 82.7 | 8.8     | 14.8  | 84.8 |
| CoTracker + Zoedepth  | 10.0    | 15.9  | 87.8 | 5.0        | 9.1   | 82.6 | 11.2    | 19.4  | 80.0 | 8.7     | 14.8  | 83.4 |
| TAPIR + Zoedepth      | 9.0     | 14.3  | 79.7 | 5.2        | 8.8   | 81.6 | 10.7    | 18.2  | 78.7 | 8.3     | 13.8  | 80.0 |
| BootsTAPIR + COLMAP   | 9.1     | 14.5  | 78.6 | 11.8       | 18.6  | 83.8 | 6.9     | 11.6  | 81.8 | 9.3     | 14.9  | 81.4 |
| CoTracker + COLMAP    | 8.0     | 12.3  | 78.6 | 11.7       | 19.1  | 81.7 | 8.1     | 13.5  | 77.2 | 9.3     | 15.0  | 79.1 |
| TAPIR + COLMAP        | 7.1     | 11.9  | 72.6 | 8.9        | 14.7  | 80.4 | 6.1     | 10.7  | 75.2 | 7.4     | 12.4  | 76.1 |
| TAPIR-3D              | 2.5     | 4.8   | 86.0 | 3.2        | 5.9   | 83.3 | 3.6     | 7.0   | 78.9 | 3.1     | 5.9   | 82.8 |
| SpatialTracker        | 9.9     | 16.1  | 89.0 | 6.2        | 11.1  | 83.7 | 10.9    | 19.2  | 78.6 | 9.0     | 15.5  | 83.7 |
| Static Tracks         | 4.9     | 10.2  | 55.4 | 3.9        | 6.5   | 80.8 | 5.9     | 11.5  | 75.8 | 4.9     | 9.4   | 70.7 |

Table 3: **Using median depth scaling.** We compare the performance on the `full_eval` split of 2D-TAP models [3, 4, 6] combined with ZoeDepth [2] and COLMAP [10]. We also include SpatialTracker [12], and a static point baseline.

92 As expected, the AJ increases when using the less-strict local rescaling approaches. That is, *per-*  
93 *trajectory* scaling require less scale consistency than the *local neighborhood* metric, which itself  
94 is less stringent than the *global median scaling*. However, different methods improve by different  
95 amounts. Perhaps most surprisingly, COLMAP gives strong performance with local and per-trajectory  
96 rescaling, but underperforms Zoedepth on Aria and Panoptic Studio when evaluated with global  
97 rescaling. This is likely because COLMAP completely fails to reconstruct moving content. For  
98 scenes where the majority of tracks are moving, the median rescaling will fail completely; therefore,  
99 Zoedepth giving reasonable estimates for a larger fraction of points gives it an advantage.

100 TAPIR-3D, unsurprisingly, presents poor performance using global or local scaling, as it does not  
101 provide relative depth estimates for different tracks. However, evaluated with per-trajectory scaling,  
102 it gives competitive results on DriveTrack, even outperforming SpaTracker. This is somewhat  
103 surprising given that it operates on a completely different principle than other methods; it is trained  
104 using entirely synthetic data and does not use any geometric constraints, nor relies on monodepth  
105 models providing geometric priors. Overall, the different strengths and weaknesses of these highly-  
106 diverse methods suggests that the best performance will come from a method that combines ideas  
107 from all three. SpaTracker is a step in this direction, using a monodepth initialization while checking  
108 the 2D consistency of 3D reconstructions via reprojection, similar to COLMAP, and it often gives  
109 competitive performance. We hope that this benchmark can provide a way to quantify how well  
110 future methods in this vein accomplish the task.

111 Finally, we include a static baseline, which predicts the static 3D point  $P_q = K^{-1}[x_q, y_q, 1]^T \cdot Z_q$   
112 for all timestamps, in order to quantify the impact of motion. Note that this baseline still requires  
113 ground truth depth for the query points, and so isn't trivial to reproduce automatically; however,  
114 it still performs very poorly, even for the PStudio dataset where the camera is static (note that the  
115 static baseline is static *in the camera coordinate frame*). Thus, we conclude tracking the camera and  
116 tracking the objects is important for obtaining strong performance.

## 117 5. Evaluations using Fixed Metric Distance Thresholds

118 In the Average Jaccard formulation in Section 3.5, we describe how we use determine correctly  
 119 predicted points along a trajectory, using a depth-adaptive radius threshold denoted  $\delta_{3D}(P_t^i)$ . We also  
 120 explored using a fixed metric threshold. Specifically, instead of the  $\{1, 2, 4, 8, 16\}$  pixel thresholds  
 121 (projected into 3D), we use a the fixed metric radius thresholds of 1 centimeter, 4 centimeter, 16  
 122 centimeters, 64 centimeters, and 2.56 meters. If the predicted point is within this distance to the  
 123 ground truth point, it is marked as position correct within that threshold. Table 4 describes the model  
 124 baselines results using this alternative metric.

|                       | Baseline | Aria             |                |               | DriveTrack       |                |               | PStudio          |                |               | Average          |                |               |
|-----------------------|----------|------------------|----------------|---------------|------------------|----------------|---------------|------------------|----------------|---------------|------------------|----------------|---------------|
|                       |          | 3D-AJ $\uparrow$ | APD $\uparrow$ | OA $\uparrow$ | 3D-AJ $\uparrow$ | APD $\uparrow$ | OA $\uparrow$ | 3D-AJ $\uparrow$ | APD $\uparrow$ | OA $\uparrow$ | 3D-AJ $\uparrow$ | APD $\uparrow$ | OA $\uparrow$ |
| BootsTAPIR + Zoedepth | 31.9     | 45.6             | 86.5           | 11.4          | 16.3             | 85.3           | 41.5          | 55.9             | 82.7           | 28.3          | 39.2             | 84.8           |               |
| CoTracker + Zoedepth  | 32.7     | 44.0             | 87.8           | 10.7          | 16.2             | 82.6           | 40.2          | 56.1             | 80.0           | 27.8          | 38.8             | 83.4           |               |
| TAPIR + Zoedepth      | 28.2     | 41.7             | 79.7           | 11.0          | 15.9             | 81.6           | 39.0          | 55.2             | 78.7           | 26.1          | 37.6             | 80.0           |               |
| BootsTAPIR + COLMAP   | 24.0     | 35.5             | 78.6           | 18.7          | 25.2             | 83.8           | 31.6          | 43.6             | 81.8           | 24.7          | 34.7             | 81.4           |               |
| CoTracker + COLMAP    | 23.6     | 33.6             | 78.6           | 18.2          | 25.7             | 81.7           | 31.6          | 44.1             | 77.2           | 24.4          | 34.4             | 79.1           |               |
| TAPIR + COLMAP        | 20.5     | 32.2             | 72.6           | 15.5          | 21.9             | 80.4           | 28.8          | 41.7             | 75.2           | 21.6          | 31.9             | 76.1           |               |
| TAPIR-3D              | 19.2     | 29.9             | 86.0           | 7.0           | 10.9             | 83.3           | 24.8          | 36.1             | 78.9           | 17.0          | 25.6             | 82.8           |               |
| SpatialTracker        | 33.1     | 45.0             | 89.0           | 13.1          | 19.3             | 83.7           | 39.5          | 56.1             | 78.6           | 28.5          | 40.2             | 83.7           |               |
| Static Tracks         | 21.2     | 40.3             | 55.4           | 5.8           | 9.7              | 80.8           | 31.7          | 46.4             | 75.8           | 19.6          | 32.1             | 70.7           |               |

Table 4: **Using fixed metric thresholds for AJ, with median scaling.** We compare the performance on the full\_eval split of several 2D-TAP models [3, 4, 6] combined with ZoeDepth [2] and COLMAP [10]. We also include SpatialTracker [12] and the static point baseline.

## 125 6. Baselines Details and Compute Resources

126 **CoTracker.** We use the pretrained model and PyTorch code from the official CoTracker codebase  
 127 and run inference enabling the bi-directional tracking mode, with no other modifications to the default  
 128 parameters. Internally, inference is performed in  $512 \times 384$  resolution, and the output predictions  
 129 are rescaled back to the original clip resolutions. Inference is performed using A100 GPUs, and  
 130 processing each dataset clip takes about 30s, totaling roughly 38 GPUh for running CoTracker on the  
 131 whole benchmark.

132 **BootsTAPIR and TAPIR.** We use the pretrained models and JAX code from the official codebase and  
 133 run inference with the default parameters. Internally, inference is performed in  $256 \times 256$  resolution,  
 134 and the output predictions are rescaled back to the original clip resolutions. Inference was performed  
 135 in a CPU cluster using up to 1024 CPUs and totalling about 22800 CPUh.

136 **COLMAP.** For running COLMAP, we dumped the 2D tracks estimated by CoTracker, TAPIR and  
 137 BootsTAPIR as a set of per-frame image feature files and corresponding matches in txt format and  
 138 imported those in COLMAP using the ‘feature\_importer’ and ‘matches\_importer’ functionality. We  
 139 then perform 3D reconstruction through the incremental mapping pipeline (‘mapper’). As each input  
 140 2D track can lead to multiple reconstructed 3D points across time (eg. for moving objects), we only  
 141 keep those with larger “track length” (number of images where that 3D point was reconstructed from).  
 142 Finally, we transform the resulting reconstructed 3D points positions in world coordinates to camera  
 143 coordinates using the predicted extrinsic parameters. Inference was performed in a CPU cluster using  
 144 up to 1024 CPUs and totalling about 14000 CPUh.

145 **ZoeDepth.** We used the pretrained models and PyTorch code from the official codebase and run  
 146 inference with the default parameters. Inference is performed in the native resolution for the ADT  
 147 and Panoptic Studio clips and in  $720 \times 480$  for DriveTrack, where the original resolution was too  
 148 large for running infrence in this model on a standard GPU. Inference was performed on 16 V100  
 149 GPUs, totalling about 200GPUh.

## 150 TAPIR3D

151 We propose a straightforward extension of TAPIR to 3D by training on 3D ground truth from  
152 Kubric [5]. As Kubric is synthetic data, it is straightforward to obtain ground-truth 3D point tracks.  
153 However, we don't expect that Monodepth models trained on Kubric will generalize, as the scenes are  
154 very different from real ones. However, we expect that a model trained here might be able to estimate  
155 *relative* depth of a point at different times on the trajectory, relative to the query point. Like with  
156 point tracking, we expect that low-level texture information may be sufficient to predict the relative  
157 depth (specifically, the scaling of the texture elements), and so high-level semantic understanding  
158 won't be necessary, meaning that it can be learned from a semantically meaningless dataset.

159 Specifically, we train TAPIR to output the log depth of each point on the trajectory, relative to the  
160 query point. This is a scalar quantity, and can be predicted using the same network structure as the  
161 other scalar quantities, e.g., the occlusion logit. That is, we predict an initial log-space scale factor  
162 for every frame by adding an extra head to TAPIR's occlusion prediction network, which performs  
163 convolutions on top of the cost volume for each frame followed by global average pooling. Then  
164 we feed this estimate to the iterative refinement steps by concatenating it with the local score maps,  
165 the initial occlusion estimate, and so on, passing it through the 1-D convolutional network which  
166 produces an update; again, we add an extra head on this network which produces an updated relative  
167 depth estimate. We apply an L1 loss on the estimate for both the initialization and each of the four  
168 refinement passes, with a weight of 1.0. Otherwise, we train the entire network using the procedure  
169 described in [3].

## 170 7. Filtering Incorrect Trajectories

171 We apply different automatic filters for removing problematic tracks. Tracks can present three type of  
172 issues: (i) issues with visibility flags, (ii) queries which are outside the moving objects, and (iii) noisy  
173 3D trajectories.

174 We found visibility issues (i) to be present in all dataset splits, and we remove it simply by oversam-  
175 pling the number of query points and discarding those whose visibility flag changes state more than a  
176 10% of the number of frames in the video.

177 Issue (ii) was present mostly in the DriveTrack split, where trajectories in a video are localized and  
178 describe the motion of exactly one moving object in the scene. In some cases the 3D point-clouds  
179 associated with vehicles also contain points that are within the object bounding box, but outside of  
180 the object itself, such as in the road. To filter out errant trajectories, we use the Segment Anything  
181 model (SAM) to generate an object mask for each frame [7]. We prompt SAM with a point prompt,  
182 computed by taking the geometric median of DriveTrack trajectories at each point in time.

183 Finally, we found that noisy 3D trajectories (iii) could occur in the Panoptic Studio split, where  
184 sometimes the reconstructed 3D Gaussians were not sufficiently constrained due to surfaces having  
185 uniform colors. In this case we apply a similar approach as before, and score trajectories based on the  
186 percentage of time they are on foreground object masks across all camera viewpoints. We perform a  
187 hyperparameter search on the threshold value and select the points that stay on the object masks at  
188 least 75% of the time across all masks, which removes most of the problematic points.

## 189 8. Dataset Specifications, Metadata, and other Details

190 For this dataset release, we preserve the licenses for the constituent original data sources, which are  
191 non-commercial. For our additions, to the extent that we can, we release under a standard Apache 2.0  
192 license. A full amalgamated license will be available in the open-sourced repository during complete  
193 release of the work, after the review period is finished.

194 We will publicly host the dataset for wide consumption by researchers on Google Cloud Storage  
195 indefinitely. Part of the dataset is already hosted in this way (and how the Colab link linked above

196 is able to run). We also intend to open-source code for computing the new 3D-AJ metrics after the  
197 camera ready. We anticipate the release will require little maintenance (and the TAPVid-2D dataset  
198 release that the team released two years ago is similarly low maintenance), but we are happy to  
199 address any emergent issues raised by users.

200 Specific implementation details on how the dataset can be read are found in the Colab link provided.  
201 Each dataset example is provided in a `*.npz` file, containing the fields: `tracks_xyz` of shape  $[T, Q,$   
202  $3]$  (containing the  $Q$  ground truth point tracks for the corresponding video of  $T$  frames, with  $(x, y, z)$ -  
203 coordinates in meters), `query_xynt` of shape  $[Q, 3]$  (containing each track's query point position in  
204 format  $(x, y, t)$ , in  $(x,y)$ -pixel space and  $t$  as the query frame index), the ground truth visibility  
205 flags with shape  $[Q, T]$ , and the `camera_intrinsics` (as  $[f_x, f_y, c_x, c_y]$ ). Each `*.npz` file is named  
206 after its corresponding video in the original data source, which can be loaded by downloading from  
207 the original hosting sites [1, 9, 11], respecting their corresponding licenses.

## 208 9. Visualized Samples

209 See Figures 2, 3, 4, 5, 6, 7, 8, 9, and 10 below.

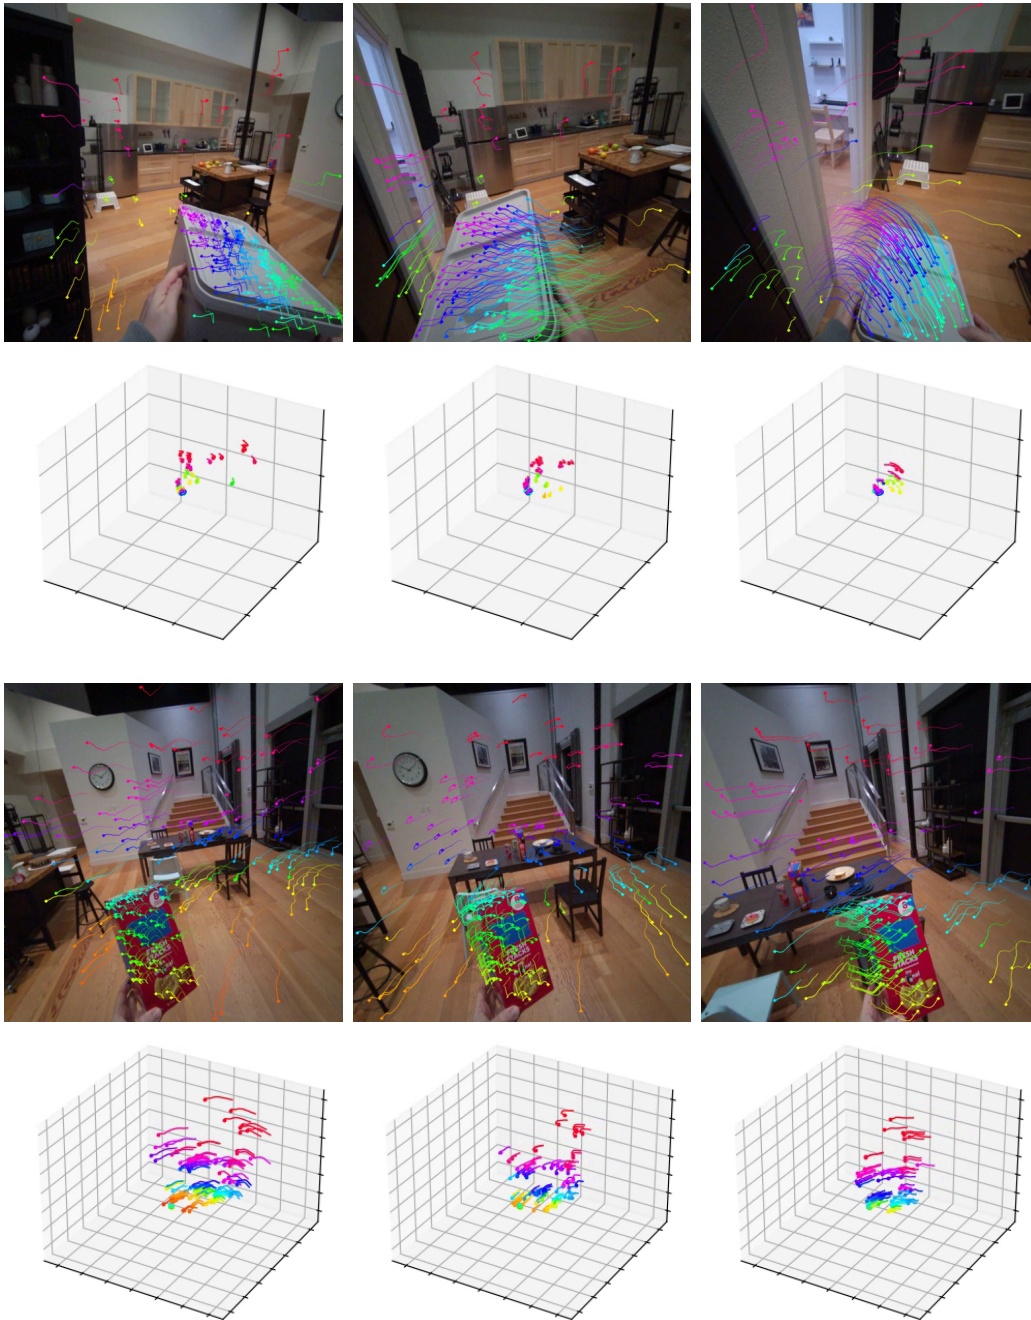

Figure 2: Random samples from ADT subset in TAPVid-3D: on the top row, we visualize the point trajectories projected into the 2D video frame; on the bottom row, we visualize the metric 3D point trajectories. For each video, we show 3 frames sampled at time step 30, 60 and 90.



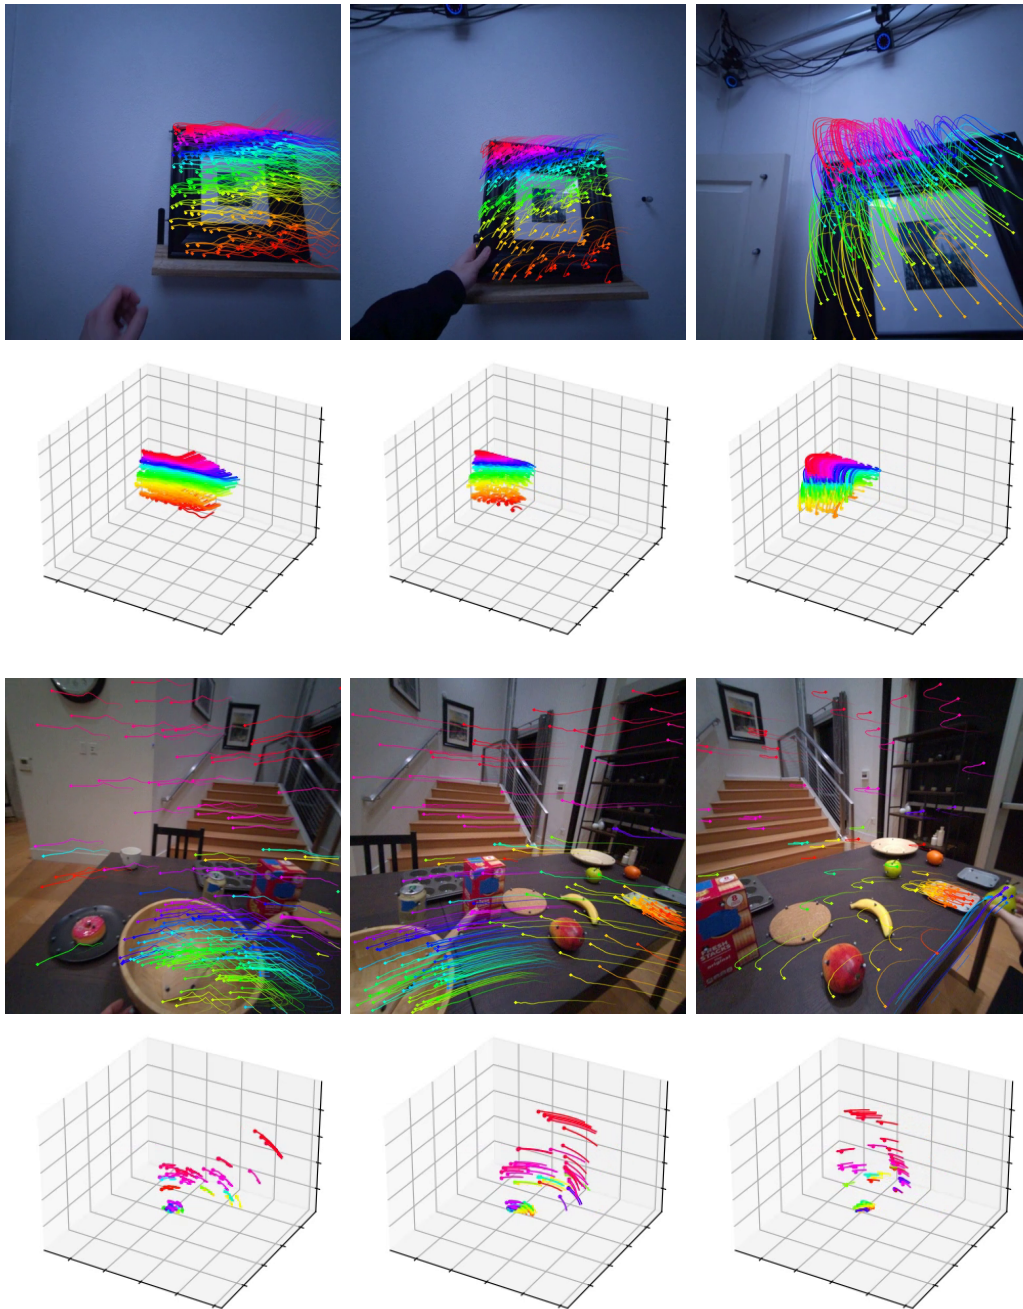

Figure 3: Random samples from ADT subset in TAPVid-3D (cont'd.): on the top row, we visualize the point trajectories projected into the 2D video frame; on the bottom row, we visualize the metric 3D point trajectories. For each video, we show 3 frames sampled at time step 30, 60 and 90.

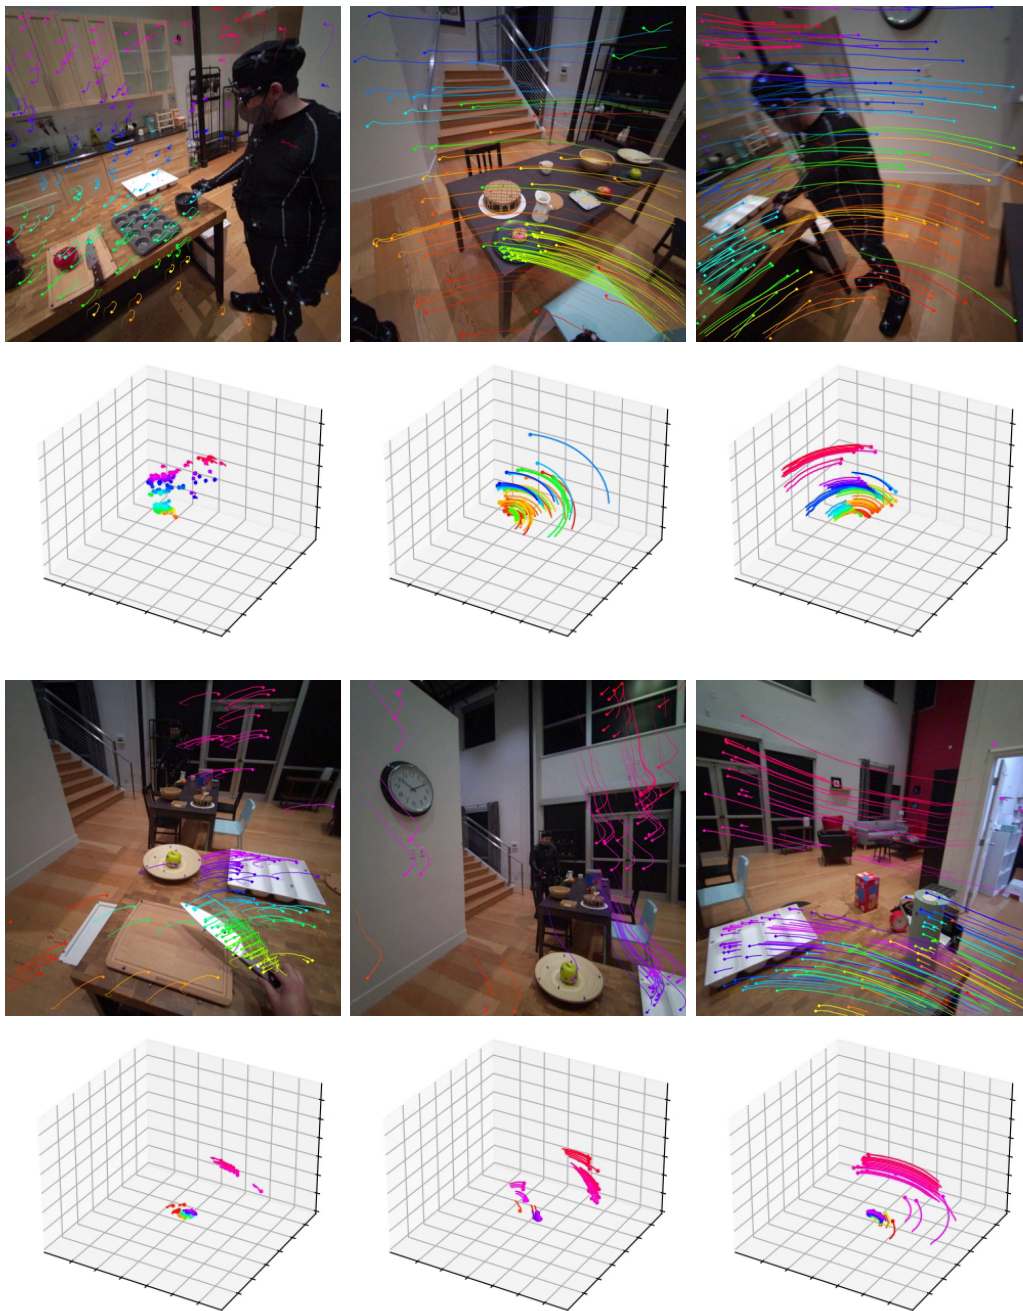

Figure 4: Random samples from ADT subset in TAPVid-3D (cont'd.): on the top row, we visualize the point trajectories projected into the 2D video frame; on the bottom row, we visualize the metric 3D point trajectories. For each video, we show 3 frames sampled at time step 30, 60 and 90.

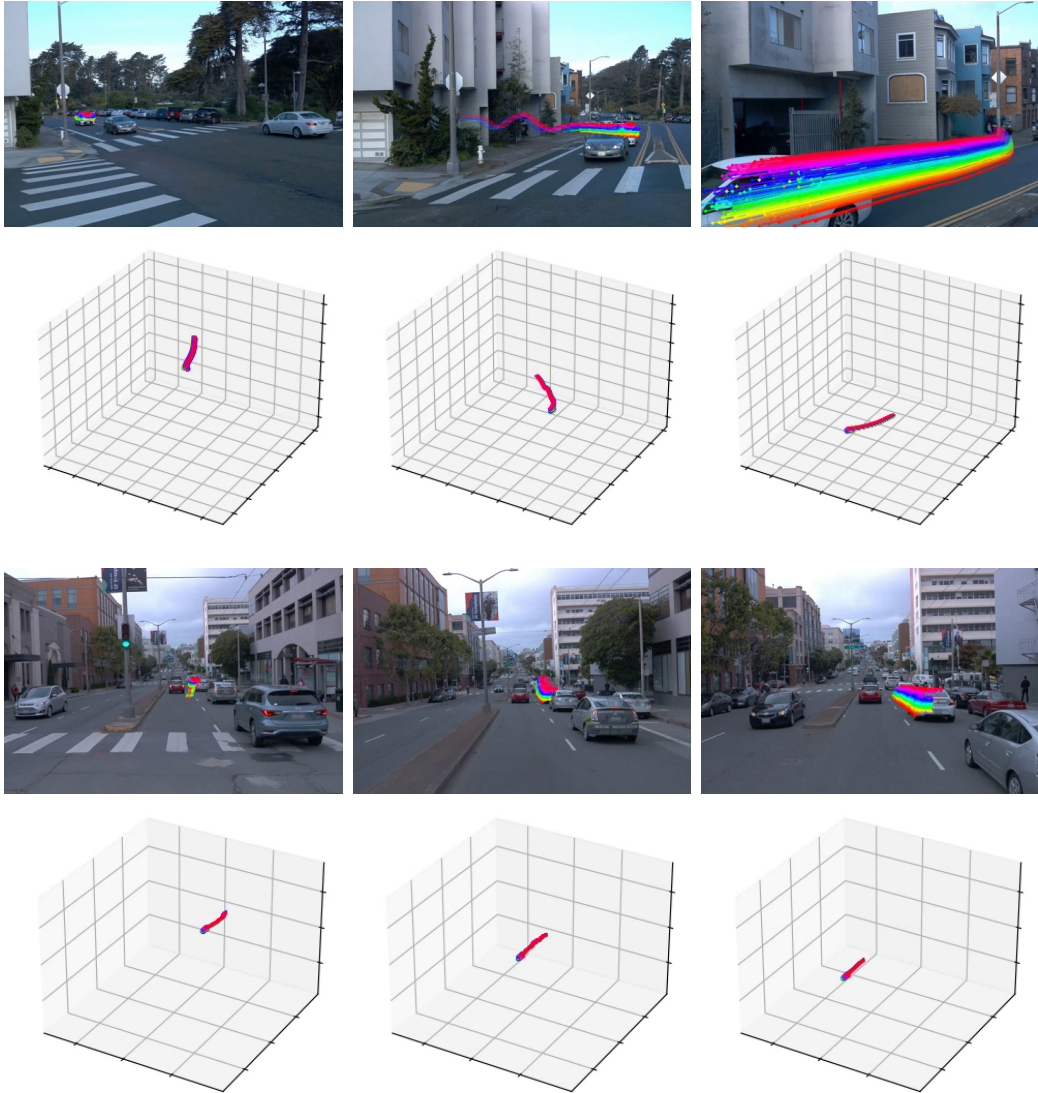

Figure 5: Random samples from DriveTrack subset in TAPVid-3D: on the top row, we visualize the point trajectories projected into the 2D video frame; on the bottom row, we visualize the metric 3D point trajectories. For each video, we show 3 frames sampled at time step 30, 60 and 90.

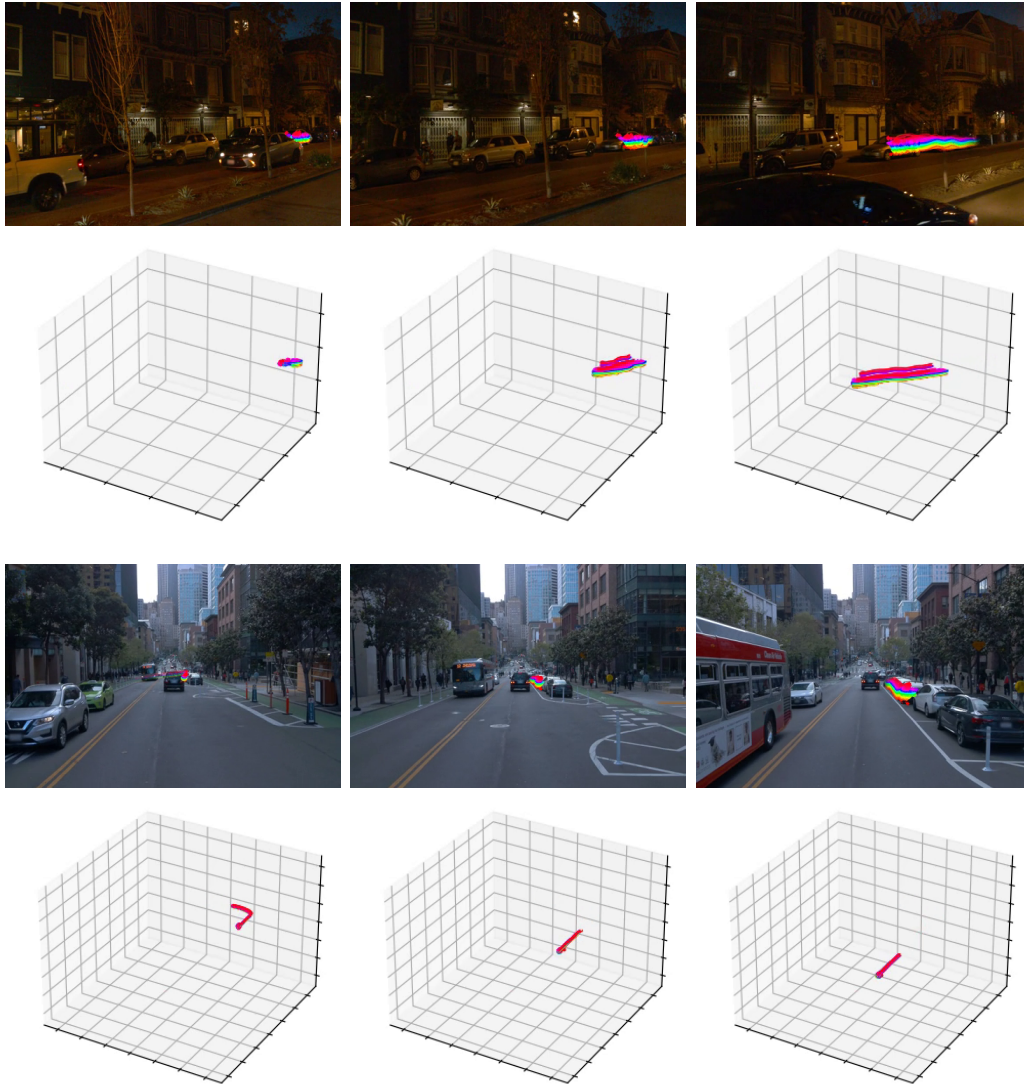

Figure 6: Random samples from DriveTrack subset in TAPVid-3D (cont'd.): on the top row, we visualize the point trajectories projected into the 2D video frame; on the bottom row, we visualize the metric 3D point trajectories. For each video, we show 3 frames sampled at time step 30, 60 and 90.

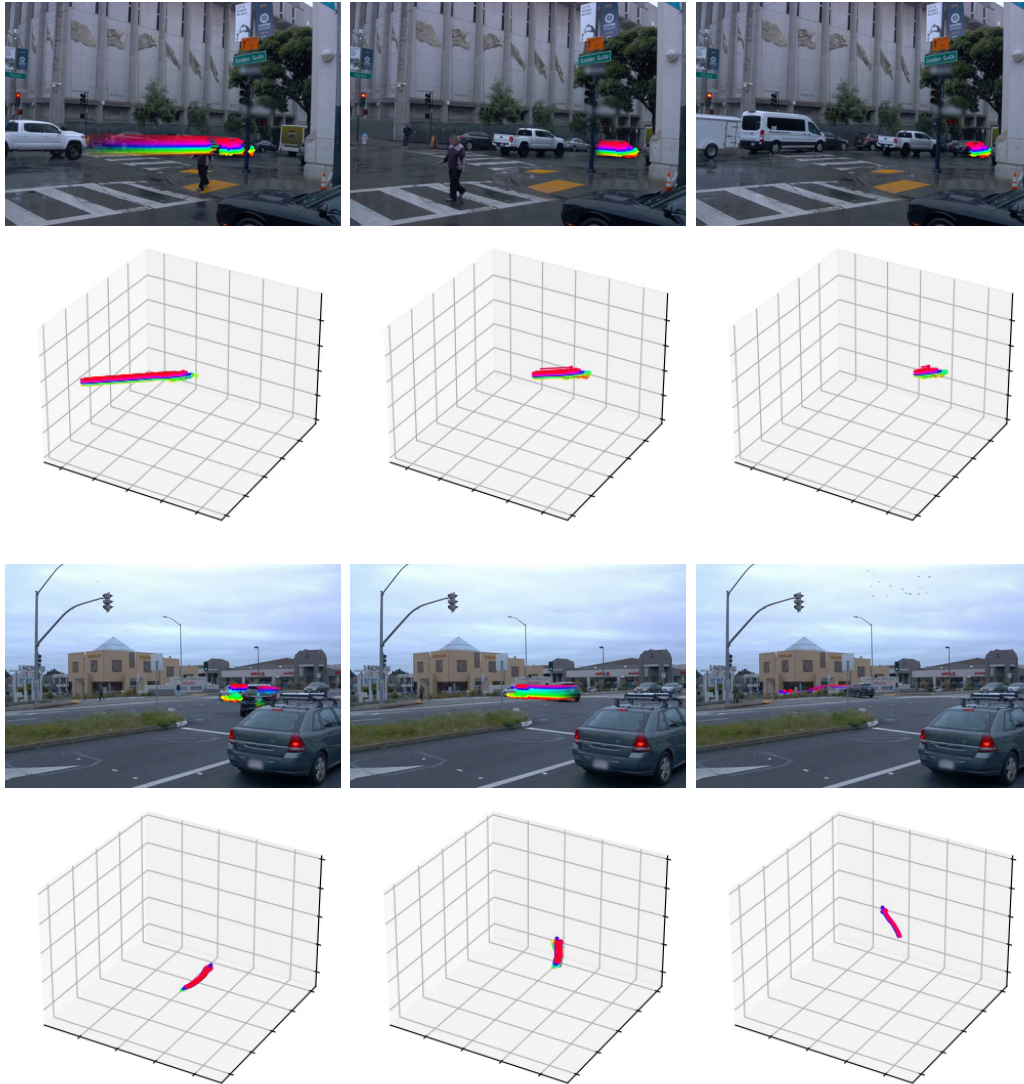

Figure 7: Random samples from DriveTrack subset in TAPVid-3D (cont'd.): on the top row, we visualize the point trajectories projected into the 2D video frame; on the bottom row, we visualize the metric 3D point trajectories. For each video, we show 3 frames sampled at time step 30, 60 and 90.

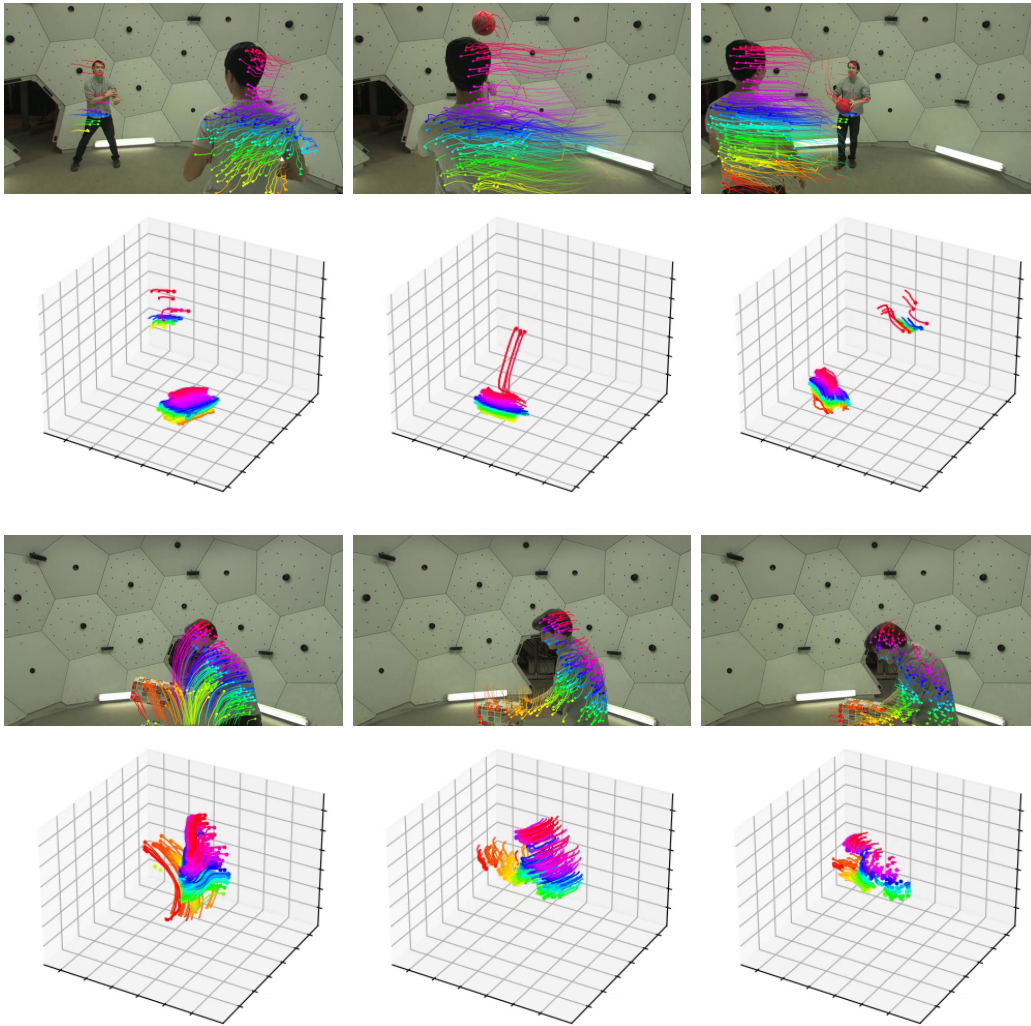

Figure 8: Random samples from Panoptic Studio subset in TAPVid-3D: on the top row, we visualize the point trajectories projected into the 2D video frame; on the bottom row, we visualize the metric 3D point trajectories. For each video, we show 3 frames sampled at time step 30, 60 and 90.

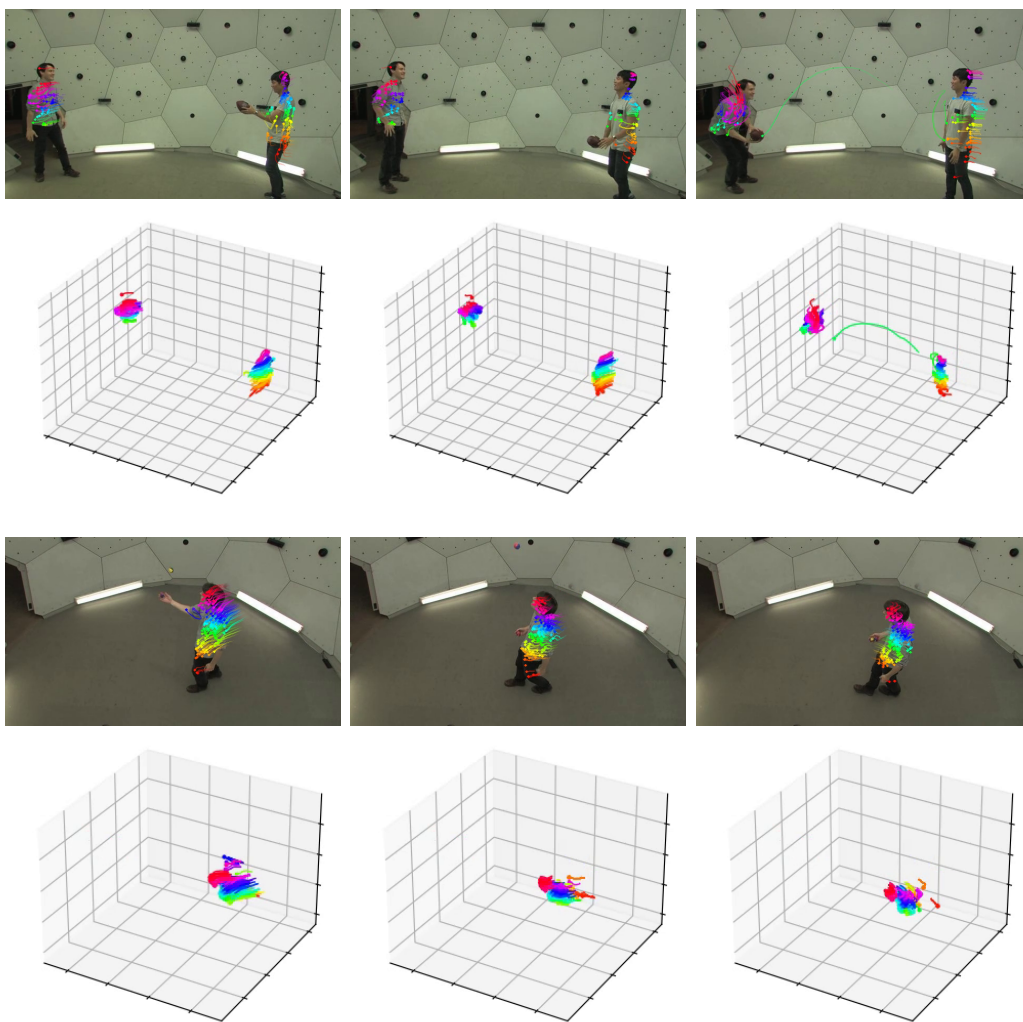

Figure 9: Random samples from Panoptic Studio subset in TAPVid-3D (cont'd.): on the top row, we visualize the point trajectories projected into the 2D video frame; on the bottom row, we visualize the metric 3D point trajectories. For each video, we show 3 frames sampled at time step 30, 60 and 90.

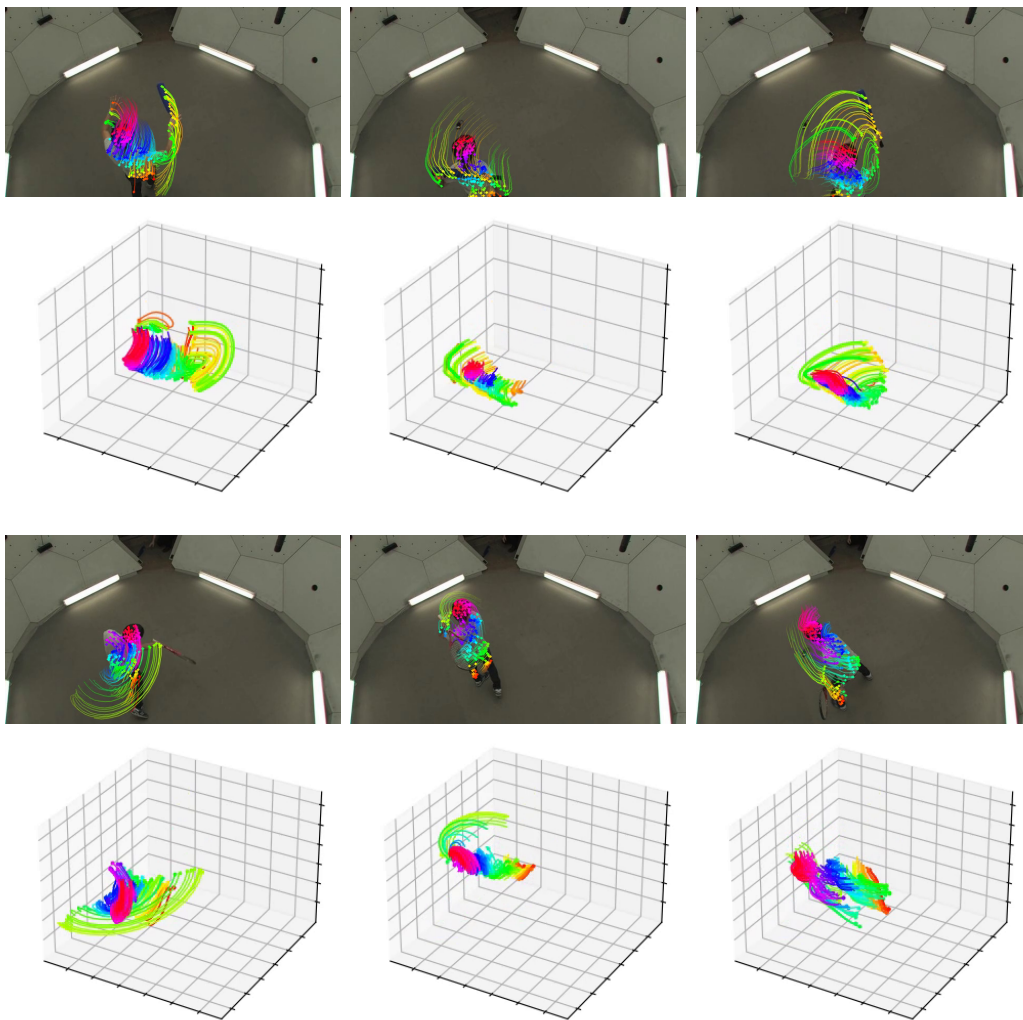

Figure 10: Random samples from Panoptic Studio subset in TAPVid-3D (cont'd.): on the top row, we visualize the point trajectories projected into the 2D video frame; on the bottom row, we visualize the metric 3D point trajectories. For each video, we show 3 frames sampled at time step 30, 60 and 90.



## 210 References

- 211 [1] Arjun Balasingam, Joseph Chandler, Chenning Li, Zhoutong Zhang, and Hari Balakrishnan.  
212 Drivetrack: A benchmark for long-range point tracking in real-world videos. *arXiv preprint*  
213 *arXiv:2312.09523*, 2023.
- 214 [2] Shariq Farooq Bhat, Reiner Birkel, Diana Wofk, Peter Wonka, and Matthias Müller. Zoedepth:  
215 Zero-shot transfer by combining relative and metric depth. *arXiv preprint arXiv:2302.12288*,  
216 2023.
- 217 [3] Carl Doersch, Yi Yang, Mel Vecerik, Dilara Gokay, Ankush Gupta, Yusuf Aytar, Joao Carreira,  
218 and Andrew Zisserman. TAPIR: Tracking any point with per-frame initialization and temporal  
219 refinement. *arXiv preprint arXiv:2306.08637*, 2023.
- 220 [4] Carl Doersch, Yi Yang, Dilara Gokay, Pauline Luc, Skanda Koppula, Ankush Gupta, Joseph  
221 Heyward, Ross Goroshin, João Carreira, and Andrew Zisserman. Bootstap: Bootstrapped  
222 training for tracking-any-point. *arXiv preprint arXiv:2402.00847*, 2024.
- 223 [5] Klaus Greff, Francois Belletti, Lucas Beyer, Carl Doersch, Yilun Du, Daniel Duckworth, David J  
224 Fleet, Dan Gnanapragasam, Florian Golemo, Charles Herrmann, et al. Kubric: A scalable  
225 dataset generator. In *Proc. CVPR*, 2022.
- 226 [6] Nikita Karaev, Ignacio Rocco, Benjamin Graham, Natalia Neverova, Andrea Vedaldi, and  
227 Christian Rupprecht. CoTracker: It is better to track together. *arXiv preprint arXiv:2307.07635*,  
228 2023.
- 229 [7] Alexander Kirillov, Eric Mintun, Nikhila Ravi, Hanzi Mao, Chloe Rolland, Laura Gustafson,  
230 Tete Xiao, Spencer Whitehead, Alexander C Berg, Wan-Yen Lo, et al. Segment anything. In  
231 *Proceedings of the IEEE/CVF International Conference on Computer Vision*, pages 4015–4026,  
232 2023.
- 233 [8] Hao Liu, Yanni Ma, Qingyong Hu, and Yulan Guo. Centertube: Tracking multiple 3d objects  
234 with 4d tubelets in dynamic point clouds. *IEEE Transactions on Multimedia*, 2023.
- 235 [9] Xiaqing Pan, Nicholas Charron, Yongqian Yang, Scott Peters, Thomas Whelan, Chen Kong,  
236 Omkar Parkhi, Richard Newcombe, and Yuheng Carl Ren. Aria digital twin: A new benchmark  
237 dataset for egocentric 3d machine perception. In *Proceedings of the IEEE/CVF International*  
238 *Conference on Computer Vision*, pages 20133–20143, 2023.
- 239 [10] Johannes Lutz Schönberger and Jan-Michael Frahm. Structure-from-motion revisited. In  
240 *Conference on Computer Vision and Pattern Recognition (CVPR)*, 2016.
- 241 [11] Pei Sun, Henrik Kretschmar, Xerxes Dotiwalla, Aurelien Chouard, Vijaysai Patnaik, Paul  
242 Tsui, James Guo, Yin Zhou, Yuning Chai, Benjamin Caine, et al. Scalability in perception for  
243 autonomous driving: Waymo open dataset. In *Proceedings of the IEEE/CVF conference on*  
244 *computer vision and pattern recognition*, pages 2446–2454, 2020.
- 245 [12] Yuxi Xiao, Qianqian Wang, Shangzhan Zhang, Nan Xue, Sida Peng, Yujun Shen, and Xiaowei  
246 Zhou. Spatialtracker: Tracking any 2d pixels in 3d space. *arXiv preprint arXiv:2404.04319*,  
247 2024.
